# 1 **Evaluating the Genome and Resistome of Extensively Drug-Resistant *Klebsiella*** 2 ***pneumoniae* using Native DNA and RNA Nanopore Sequencing**

3

4 Miranda E. Pitt<sup>1,\*</sup>, Son H. Nguyen<sup>1</sup>, Tânia P.S. Duarte<sup>1</sup>, Mark A.T. Blaskovich<sup>1</sup>, Matthew A. Cooper<sup>1</sup>, Lachlan J.M.  
5 Coin<sup>1,\*</sup>

6

7 <sup>1</sup>Institute for Molecular Bioscience, The University of Queensland, Brisbane, Queensland, 4072, Australia

8 \* To whom correspondence should be addressed. Email: [miranda.pitt@imb.uq.edu.au](mailto:miranda.pitt@imb.uq.edu.au), [l.coin@imb.uq.edu.au](mailto:l.coin@imb.uq.edu.au)

9

## 10 **ABSTRACT**

11 *Klebsiella pneumoniae* frequently harbour multidrug resistance and current methodologies are struggling to rapidly  
12 discern feasible antibiotics to treat these infections. While rapid DNA sequencing has been proposed for prediction of  
13 resistance profile; the role of rapid RNA sequencing has yet to be fully explored. The MinION sequencer can sequence  
14 native DNA and RNA in real-time, providing an opportunity to contrast the utility of DNA and RNA for prediction  
15 of drug susceptibility. This study interrogated the genome and transcriptome of four extensively drug-resistant (XDR)  
16 *K. pneumoniae* clinical isolates. The majority of acquired resistance ( $\geq 75\%$ ) resided on plasmids including several  
17 megaplasmids ( $\geq 100$  kbp). DNA sequencing identified most resistance genes ( $\geq 70\%$ ) within 2 hours of sequencing.  
18 Direct RNA sequencing (with a  $\sim 6x$  slower pore translocation) was able to identify  $\geq 35\%$  of resistance genes,  
19 including aminoglycoside,  $\beta$ -lactam, trimethoprim and sulphamide and also quinolone, rifampicin, fosfomycin and  
20 phenicol in some isolates, within 10 hours of sequencing. Polymyxin-resistant isolates showed a heightened  
21 transcription of *phoPQ* ( $\geq 2$ -fold) and the *pmrHFIJKLM* operon ( $\geq 8$ -fold). Expression levels estimated from direct  
22 RNA sequencing displayed strong correlation (Pearson: 0.86) compared to qRT-PCR across 11 resistance genes.  
23 Overall, MinION sequencing rapidly detected the XDR *K. pneumoniae* resistome and direct RNA sequencing revealed  
24 differential expression of these genes.

25

## 26 INTRODUCTION

27 *Klebsiella pneumoniae* is one of the leading causes of nosocomial infections, with reports of mortality rates as high  
28 as 50% (1-5). This opportunistic pathogen frequently exhibits multidrug resistance which severely limits treatment  
29 options (6). A high abundance of resistance is commonly encoded on plasmids, accounting for the rapid global  
30 dissemination of resistance (1,6). Common therapeutic options for multidrug-resistant infections include  
31 carbapenems, fosfomycin, tigecycline and polymyxins (7). However, resistance is also rapidly developing against  
32 these antibiotics (6). Alarmingly, pandrug-resistant (PDR) *K. pneumoniae* have emerged which are resistant to all  
33 commercially available antibiotics (8,9).

34 One of the major contributors to the advent of antibiotic resistance is the inability for current detection  
35 methodologies to readily and accurately assess bacterial infections in particular, the resistance profile (10). This has  
36 resulted in the unnecessary use of antibiotics for viral infections and ineffective antibiotics being administered for  
37 resistant infections. Rapid sequencing has been proposed as a way to determine pandrug resistance profiles, including  
38 approaches which utilise high accuracy short reads, as well as those which exploit real-time single-molecule  
39 sequencing such as Oxford Nanopore Technologies (ONT). The ONT MinION platform is a portable single-molecule  
40 sequencer which can sequence long fragments of DNA and stream the sequence data for further data processing in  
41 real-time, detecting the presence of bacterial species and acquired resistance genes (11-15). Moreover, the long reads  
42 coupled with the ability to multiplex samples has immensely aided with the assembly of bacterial genomes (16-18).  
43 This capability allows for the rapid determination of whether resistance is residing on the chromosome or plasmid/s.  
44 Of particular interest are high levels of resistance encoded on plasmids, as these genes can rapidly be transferred  
45 throughout the bacterial population via horizontal gene transfer.

46 ONT has recently released a direct RNA sequencing capability, which sequences native transcripts. Other  
47 sequencing technologies rely on fragmentation, cDNA conversion and PCR steps which create experimental bias and  
48 hinder the accuracy of determining gene expression (19,20). The ability for MinION sequencing to read long  
49 fragments enables full length transcripts to be investigated. To date, only a few direct RNA sequencing publications  
50 exist which include eukaryote transcriptomes, primarily yeast (*Saccharomyces cerevisiae* (19,21)) and recently,  
51 human (BioRxiv: <https://doi.org/10.1101/459529>). This sequencing has additionally been implemented in viral  
52 transcriptomics (22, BioRxiv: <https://doi.org/10.1101/300384>, BioRxiv: <https://doi.org/10.1101/373522>). Only one  
53 prior study by Smith AM *et al.* has applied this sequencing to bacterial 16S ribosomal RNA (rRNA) to detect  
54 epigenetic modifications (BioRxiv: <https://doi.org/10.1101/132274>). Bacterial transcription differs significantly from  
55 eukaryotes in that transcription and translation occur simultaneously. As a result, bacterial mRNA transcripts lack  
56 poly(A) tails and alternative splicing (23). The poly(A) tail is critical for the library preparation for ONT sequencing  
57 thus, we have established a methodology for adding this component onto transcripts.

58 In this study, we applied MinION sequencing to interrogate both the genome and the transcriptome (via direct  
59 RNA sequencing) for XDR *K. pneumoniae* clinical isolates. Of interest was to compare the potential for RNA  
60 sequencing to provide a better correlation to the resistance phenotype than DNA sequencing. These isolates have  
61 previously undergone ‘traditional’ whole genome sequencing (Illumina) and antimicrobial susceptibility testing (24).  
62 Three strains were selected from this cohort which exhibited resistance to all 24 classes or combinations of antibiotics

63 tested, a high abundance of antibiotic resistance genes ( $\geq 26$ ) and differing lineages (ST11 (16\_GR\_13), ST147  
64 (1\_GR\_13) and ST258 (2\_GR\_12)). Additionally, these isolates harbour polymyxin resistance which is facilitated by  
65 a disruption in or upstream of *mgrB*. MgrB is the negative regulator of PhoPQ and mutation results in the up-regulation  
66 of *pmrC* and the *pmrHFIJKLM* operon (25-27). This enables the addition of phosphoethanolamine and/ or 4-amino-  
67 4-deoxy-L-arabinose (Ara4N) onto the basal component of lipopolysaccharide, lipid A. These modifications perturb  
68 the key electrostatic interaction between lipid A and polymyxins that is critical for their activity (28,29). These  
69 pathways associated with polymyxin resistance were further explored using direct RNA sequencing. An additional  
70 polymyxin-susceptible XDR isolate (ST258; 20\_GR\_12) was selected to determine the differential expression  
71 associated with polymyxin resistance. This research aimed to assemble these genomes, discern the differential  
72 expression of resistance genes and ascertain the time required for detection. Furthermore, we sought to compare DNA  
73 and RNA sequencing as modalities for the rapid identification of acquired antibiotic resistance.

74

## 75 MATERIAL AND METHODS

### 76 Bacterial strains and growth conditions

77 Clinically acquired XDR *K. pneumoniae* strains were sourced through the Hygeia General Hospital, Athens, Greece  
78 (24). Antimicrobial susceptibility assays (Supplementary Table S1), sequence typing and detection of acquired  
79 resistance genes for these isolates have previously been determined (24). Strains were stored at  $-80^{\circ}\text{C}$  in 20% (v/v)  
80 glycerol and the same stock was used as per the prior study (24). When required for extractions, glycerol stocks were  
81 grown on lysogeny broth (LB) agar plates and 6 morphologically similar colonies were selected for inoculation. The  
82 inoculum was grown in LB overnight at  $37^{\circ}\text{C}$  shaking at 220 rpm. This overnight inoculum was used for both DNA  
83 and RNA extractions.

84

### 85 DNA extraction and high molecular weight DNA isolation

86 DNA was extracted from 10 ml of overnight culture using the DNeasy Blood and Tissue Kit (Qiagen) according to  
87 manufacturer's guidelines, with the addition of an enzymatic lysis buffer pre-treatment (60 mg/ml lysozyme). High  
88 molecular weight (HMW) DNA from the prior extraction was selected using the MagAttract HMW DNA Kit (Qiagen)  
89 as per manufacturer's instructions. Subtle changes included a further proteinase K treatment on the DNA extracts at  
90  $56^{\circ}\text{C}$  for 10 min followed by supplementation of RNase A (1 mg) for 15 min at room temperature. Several attempts  
91 at direct DNA extraction from bacterial cells were undertaken using the MagAttract HMW DNA kit, however, were  
92 unsuccessful with these isolates. Due to several issues with potential carbohydrate contamination (260/230 ratio:  
93  $\leq 0.3$ ), 2\_GR\_12 was also purified with the Monarch<sup>®</sup> PCR & DNA Cleanup Kit (New England BioLabs) using the  
94 protocol to isolate fragments  $>2000$  bp. DNA and RNA contamination was quantitated using Qubit<sup>®</sup>2.0 (Thermo  
95 Fisher Scientific) and purity determined with a NanoDrop 1000 Spectrophotometer (Thermo Fisher Scientific). DNA  
96 fragment sizes were determined using the Genomic DNA ScreenTape & Reagents (Agilent) and sizes from 200 to  
97  $>60000$  bp were analyzed on a 4200 TapeStation System (Agilent) (Supplementary Figure S1).

98

## 99 **RNA extraction, mRNA enrichment and poly(A) ligation**

100 The overnight culture was sub-cultured in 10 ml of cation-adjusted Muller Hinton Broth (caMHB) to reflect conditions  
101 used for minimum inhibitory concentration (MIC) assays. Cultures were grown to mid-log phase ( $OD_{600} = 0.5-0.6$ ).  
102 RNA was extracted via the PureLink™ RNA Mini Kit (Thermo Fisher Scientific) as per manufacturer's protocols  
103 which included using Homogenizer columns (Thermo Fisher Scientific). To remove DNA contamination, the TURBO  
104 DNA-free™ kit was implemented. A minor adjustment was an increased concentration of TURBO DNase (4 U)  
105 incubated at 37°C for 30 min. The RNeasy Mini Kit (Qiagen) clean up protocol was additionally used to purify and  
106 concentrate RNA samples. Ribosomal RNA was depleted via the MICROBExpress™ Bacterial mRNA Enrichment  
107 Kit (Thermo Fisher Scientific). Minor protocol changes included adding  $\geq 2$   $\mu$ g of DNA depleted RNA and the  
108 enriched mRNA was precipitated for 3 h at -20°C. Poly(A) ligation was performed using the Poly(A) Polymerase  
109 Tailing Kit (Astral Scientific) as per the manufacturer's alternative protocol (4 U input of Poly(A) Polymerase). The  
110 input RNA concentration was  $\geq 800$  ng and RNA samples were incubated at 37°C for 1 h. Poly(A) ligated RNA was  
111 purified using Agencourt AmpureXP (Beckman Coulter Australia) beads (1:1 ratio). RNA and DNA contamination  
112 was quantitated using the Qubit®2.0 (ThermoFisher Scientific) and purity determined with a NanoDrop 1000  
113 Spectrophotometer (Thermo Fisher Scientific). RNA fragment size was checked using an Agilent RNA 6000 Pico kit  
114 and run on a 2100 Bioanalyzer (Agilent Technologies) for the initial RNA extract, post ribosomal RNA depletion and  
115 after poly(A) ligation (Supplementary Figure S2).

## 116 **RNA extraction, mRNA enrichment and poly(A) ligation**

117 RNA libraries ( $\geq 600$  ng poly(A) ligated RNA) were prepared using the Direct RNA Sequencing kit (SQK-RNA001).  
118 The Rapid Barcoding Sequencing kit (SQK-RBK001) was used for HMW DNA samples (1\_GR\_13, 16\_GR\_13,  
119 20\_GR\_12; 300 ng input each). Isolate 2\_GR\_12 (300 ng input) was prepared separately using the Rapid Sequencing  
120 Kit (SQK-RAD003). Libraries were sequenced with MinION R9.4 flowcells and the raw data (fast5 files) were base-  
121 called using Albacore 2.1.1. RNA reads were additionally base-called with Albacore 2.2.7.

## 122 **Real-time resistome detection emulation**

123 The real-time emulation was performed post sequencing and the time required to detect antibiotic resistance was  
124 determined as previously described (14). Briefly, this pipeline aligns Albacore base-called reads via BWA-MEM  
125 (ArXiv: <https://arxiv.org/abs/1303.3997>) to an antibiotic resistance gene database. Antibiotic resistance genes were  
126 obtained from the ResFinder 3.0 database (30). This dataset comprises of 2131 genes which were clustered based on  
127 90% identity to form 611 groups or gene families. The detection of false positives is reduced using the multiple  
128 sequence alignment software kalign2 (31), a probabilistic Finite State Machine (32) and once the alignment score  
129 reached a threshold, the resistance gene was reported.

130

131

## 132 **Assembly of genomes**

133 To assemble genomes with both Illumina and ONT reads, SPAdes v3.10.1 (33) were utilised. Hybrid assemblers  
134 included npScarf (34) and Unicycler v0.3.1 (35). Assemblers using only ONT reads included Canu v1.5 (excluding  
135 reads <500bp) (36) and the combination of Minimap2 v2.1-r311 and Miniasm v0.2-r168-dirty; Racon (git commit  
136 834442) were used in both cases to polish the assemblies (37,38). Consensus sequences were determined using Mauve  
137 (snapshot\_2015-02-13) to construct the final assembly (39). The output from each assembly software is reported in  
138 Supplementary Table S2. Genomes were annotated using the Rapid Annotation using Subsystem Technology (RAST)  
139 which also provided a list of virulence genes (40). The location of acquired antibiotic resistance genes were determined  
140 using ResFinder 3.0 (30) and plasmids were identified via PlasmidFinder 1.3 (41). To discern if plasmid sequences  
141 have previously been reported, contigs underwent a BLASTn analysis against the National Center for Biotechnology  
142 Information (NCBI) database (<https://blast.ncbi.nlm.nih.gov/Blast.cgi>).

## 143 **RNA alignment and expression profiling**

144 Base-called RNA reads were converted to DNA (uracil bases changed to thymine) and aligned using BWA-MEM  
145 (parameters: -k 11 -W20 -r10 -A1 -B1 -O1 -E1 -L0 -Y) to the updated genome assemblies. Due to the lack of introns  
146 and full length transcripts being obtained, BEDTools coverage (42) was used to ascertain the relative expression of  
147 resistance genes. This was normalized to the number of counts obtained for the housekeeping gene, *rpsL* (43), to  
148 compare against qRT-PCR results. Read alignments were further visualised using Integrative genomics viewer (IGV)  
149 2.3.59 (44).

## 150 **Whole transcriptome differential gene expression**

151 To identify genes which were differentially expressed between a pair of samples (x and y), we used a beta-binomial  
152 distribution to calculate the probability of observing less than or equal to  $x_g$  reads mapping to gene  $g$  in sample  $x$ ,  
153 conditional on the total number of reads mapping to all genes ( $\text{sum}_g(x_g)$ ), the number of reads in sample  $y$  mapping  
154 to gene  $g$  ( $y_g$ ) as well as the total number of reads mapping to all genes in sample  $y$  ( $\text{sum}_g(y_g)$ ). This was calculated  
155 in R using the `pbetabinom.ab` function in the VGAM package, with  $q = x_g$ ,  $\text{size} = \text{sum}_g'(x_g)$ ,  $\alpha = y_g + 1$ ;  $\beta$   
156  $= \text{sum}_g'(y_g) - y_g + 1$ . Genes for which this probability was less than a predefined threshold were deemed to be  
157 significantly under expressed in sample  $x$  given sample  $y$ . A similar statistic was used to check for over-expression.

## 158 **Quantitative real-time reverse transcriptase PCR (qRT-PCR)**

159 First strand synthesis to generate cDNA (1  $\mu\text{g}$  total DNase-depleted RNA) was performed using SuperScript III  
160 (Thermo Fisher Scientific) which was also used for MinION direct RNA sequencing library preparations. Primers  
161 used are displayed in Supplementary Table S4. Samples were prepared in triplicate via the SYBR Select Master Mix  
162 (Thermo Fisher Scientific) and expression detected using a ViiA 7 Real-time PCR system (Thermo Fisher Scientific).  
163 Cycling conditions include: Hold 50°C (2 min), 95°C (2 min) followed by 50 cycles of: 95°C (15 sec), 55°C (1 min).  
164 A melt curve was included to determine the specificity of the amplification and a no template control to detect

165 contamination or primer dimers. Results were analysed with QuantStudio™ Real-Time PCR Software, triplicates  
166 were averaged, normalised to the housekeeping gene *rpsL* and relative expression determined via the  $2^{-\Delta\Delta CT}$  method  
167 (45).

## 168 **Data availability**

169 Whole genome sequencing of the 4 clinical isolates, including the recent assembly, has been deposited under  
170 BioProject PRJNA307517 ([www.ncbi.nlm.nih.gov/bioproject/PRJNA307517](http://www.ncbi.nlm.nih.gov/bioproject/PRJNA307517)). ONT DNA sequencing data has been  
171 deposited on the Sequence Read Archive ([www.ncbi.nlm.nih.gov/sra/](http://www.ncbi.nlm.nih.gov/sra/)) under study SRP133040. Accession numbers  
172 are as follows: 1\_GR\_13 (SRR6747887), 2\_GR\_12 (SRR6747886), 16\_GR\_13 (SRR6747885) and 20\_GR\_12  
173 (SRR6747884). ONT direct RNA sequencing data (pass and fail reads) have been deposited on the Sequence Read  
174 Archive ([www.ncbi.nlm.nih.gov/sra/](http://www.ncbi.nlm.nih.gov/sra/)) under study SRP133040. Accession numbers are as follows: 1\_GR\_13  
175 (SRR7719054), 2\_GR\_12 (SRR7719055), 16\_GR\_13 (SRR7719052) and 20\_GR\_12 (SRR7719053).

176

## 177 **RESULTS**

### 178 **Discerning the location of acquired resistance in the genome**

179 Utilising the capacity for MinION sequencing to read long fragments of DNA, the location of antibiotic resistance  
180 genes were clearly resolved (Table 1). All genomes were circular with the exception of 2\_GR\_12 where 3 plasmids  
181 remained linear. This was partly due to difficulties extracting DNA and not retaining long fragments (Supplementary  
182 Figure S1). Amongst the four isolates, the chromosome size ranged between 5.1-5.5 Mb which encoded resistance  
183 genes *blaSHV-11*, *fosA* and *oqxAB*. The majority of resistance ( $\geq 75\%$ ) mapped to plasmids.

184 At least one megaplasmid, defined as a plasmid larger than 100 kbp, was detected in all isolates (Table 1). These  
185 commonly harboured the replicon IncA/C2 or InFIB and IncFIIK. The IncA/C2 plasmid was present in all samples  
186 except 20\_GR\_12. This plasmid contained up to 16 resistance genes which conferred resistance towards  
187 aminoglycosides,  $\beta$ -lactams, phenicols, rifampicin, sulphonamides, tetracyclines and trimethoprim, with the exception  
188 of 16\_GR\_13. Isolate 16\_GR\_13 lacked trimethoprim resistance on its IncA/C2 plasmid. The plasmids containing  
189 both replicons IncFIB and IncFIIK differed vastly between all four replicates. All contained IncFIB<sub>pKpn3</sub> and IncFIIK,  
190 however, 1\_GR\_13 differed with IncFII<sub>pKP91</sub>. Additionally, a differing IncFIB replicon was detected on a separate  
191 contig in 1\_GR\_13 (pKPHS1) and 2\_GR\_12 (pQil). The only instance where another dual replicon was identified was  
192 in 1\_GR\_13 which harboured both IncR and IncN. This plasmid contained aminoglycoside,  $\beta$ -lactam, trimethoprim,  
193 macrolide and sulphonamide resistance. 1\_GR\_13 also contained a 5.5 kb circular contig which was annotated as a  
194 phage genome. Various regions of these megaplasmids were unique to these isolates compared to prior sequences  
195 deposited on NCBI (Supplementary Table S5).

196 The ColRNAI plasmid was present in all except 1\_GR\_13 which encoded aminoglycoside and quinolone  
197 resistance (*aac(6')-Ib*, *aac(6')-Ib-cr*) (Table 1). The ColRNAI plasmid in 2\_GR\_12 and 20\_GR\_12 was 13841 bp in  
198 size and shared 75% similarity between the two isolates. This plasmid differed in 16\_GR\_13 which contained no



199 resistance genes and 35% the size. The same IncX3 plasmid (43380 bp) was apparent in isolates 2\_GR\_12 and  
200 20\_GR\_12. Unique to 16\_GR\_13 was the IncL/ M<sub>pOXA-48</sub> plasmid containing *blaOXA-48* and the 50979 bp IncN  
201 plasmid in 20\_GR\_12 with resistance against 5 classes (aminoglycoside (*aph(3'')-Ib*, *aph(6)-Id*),  $\beta$ -lactam (*blaTEM-*  
202 *1A*), sulphonamide (*sul2*), tetracycline (*tet(A)*), trimethoprim (*dfrA14*)) of antibiotics.

203 Multiple copies of acquired resistance genes were apparent across plasmids in several isolates. For 1\_GR\_13, up  
204 to three copies were present of genes *aadA24*, *aph(3')-Ia*, *aph(6)-Id*, *dfrA1*, *dfrA14*, *strA* and *sull* (Table 1). In  
205 2\_GR\_12, *sull* and *blaTEM-1A* were duplicated and for 16\_GR\_13, only *sull* was represented twice.

## 206 Real-time detection emulation of resistance genes via DNA sequencing

207 The vast majority ( $\geq 70\%$ ) of resistance genes were detected via DNA sequencing within the first 2 hours (Figure  
208 1, Supplementary Table S3). These genes confer resistance towards aminoglycosides,  $\beta$ -lactams, fosfomycin,  
209 macrolides, phenicols, quinolones, rifampicin, sulphonamides, tetracyclines and trimethoprim. 20\_GR\_12 lacked  
210 acquired resistance genes for macrolides, phenicols and rifampicin, however, all other classes were detected within 2  
211 hours. All isolates, except 2\_GR\_12, were sequenced for 21 hours which was sufficient to obtain the complete genome  
212 assembly. Only a few additional genes were detected after the first 10 hours across isolates (Supplementary Table S3).  
213 For 2\_GR\_12, an extended run of 41 hours detected no further genes after 20 hours. Overall, the presence of these  
214 resistance genes corresponded to a resistant phenotype towards aminoglycosides,  $\beta$ -lactams, fosfomycin, phenicols,  
215 quinolones, sulphonamides (sulfamethoxazole), tetracyclines and trimethoprim (Supplementary Table S1). As  
216 macrolides and rifampicin are not routinely used to treat *K. pneumoniae* infections, no breakpoints exist according to  
217 CLSI and EUCAST guidelines, hence, MICs were not determined.

218 Post 2 hours of sequencing, several genes not observed in the final assembly via ResFinder 3.0 were detected  
219 (Supplementary Table S3). These were predominantly genes attributed to aminoglycoside,  $\beta$ -lactam, rifampicin and  
220 phenicol resistance. Furthermore, resistance genes to additional differing classes were detected including fusidic acid  
221 and vancomycin. This was evident in 2\_GR\_12 (*fusB*) and 16\_GR\_13 (*fusB*, *vanR*). However, these genes had less  
222 than 30 reads and their phred-scale mapping quality scores (MAPQ) were less than 10 (misplaced probability greater  
223 than 0.1). Furthermore, the majority of genes not observed in the final assembly nor observed in Illumina data  
224 exhibited a MAPQ score of  $\leq 10$  which may indicate that a more stringent threshold is required to negate false positives.  
225 However if this threshold increases, true positives would not be detected including *aadA1*, *aadA2* and *ARR-2* in  
226 2\_GR\_12 and *blaOXA-48*, *blaCTX-M-15* and *ARR-2* in 16\_GR\_13.

227 Several genes found in the final assembly were not detected in the real-time emulation analysis (Supplementary  
228 Table S3). This was mainly observed for aminoglycoside resistance encoding genes. For 1\_GR\_13, this included  
229 *aadA1*, *ant(2'')-Ia*, *aph(6)-Id* and *aadA24*. Similarly, 2\_GR\_12 and 20\_GR\_12 lacked *aph(3'')-Ib* and *aph(6)-Id*.  
230 2\_GR\_12 additionally had the absence of *ant(2'')-Ia*. Detection of *ant(2'')-Ia*, *aph(3'')-Ib*, *aph(6)-Id* was not present  
231 in 16\_GR\_13. 16\_GR\_13 further lacked *catB4* (phenicol) and *tet(A)* (tetracycline). Various phenicol resistance genes  
232 were reported in the real-time emulation however, the incorrect gene was identified which may represent sequencing  
233 errors accumulated over time and high similarity to other phenicol resistance genes. The tetracycline resistance gene,  
234 *tet(A)*, was interestingly not reported in this emulation with 190 reads and the majority of reads exhibiting a high

235 mapping confidence (MAPQ = 60, equivalent to an error probability of  $1 \times 10^{-6}$ ). This gene was only detected after 10  
236 hours for 1\_GR\_13 and 2\_GR\_12 and this result may be influenced by the presence of only 1 copy of *tet(A)* encoded  
237 on a low copy number megaplasmid (between 1 to 1.5, see Table 1).

### 238 **Direct RNA sequencing resistance detection**

239 The time required to detect resistance was further interrogated using RNA sequencing. Rapid detection was apparent  
240 for several resistance genes via direct RNA sequencing (Figure 1). This was evident for genes conferring resistance  
241 to aminoglycosides,  $\beta$ -lactams, sulphonamides and trimethoprim for all four isolates. Resistance towards these  
242 antibiotics was commonly detected within 6 hours. In some instances, quinolone, rifampicin, fosfomycin and phenicol  
243 resistance was detected. This result remained similar when all reads or passed reads alone were analysed. The most  
244 significant difference when analysing all reads was the detection of *fosA* in 1\_GR\_13 and *ARR-2* and *fosA* in 2\_GR\_12.  
245 Consistently absent from this analysis were genes attributed to macrolide (*mph(A)*) and tetracycline (*tet(A)*, *tet(G)*)  
246 resistance, however, isolates exhibited high levels of resistance to tetracycline ( $>64 \mu\text{g/ml}$ ) (Supplementary Table S1).  
247 This may indicate that isolates require antibiotic exposure to enable transcription of these genes. Commonly no new  
248 genes were detected after 12 hours of sequencing with the exception of *fosA* in 2\_GR\_12. Although *fosA* was detected  
249 when including the failed reads, a low MAPQ score ( $\leq 10$ ) was apparent. Similar to the DNA real-time detection,  
250 several genes not found in the final assembly were identified (Supplementary Table S3). With the exception of  
251 20\_GR\_12, this included *aadB* and *strB* for all isolates. Additional genes detected included *ARR-7* in 1\_GR\_13, *strA*  
252 in 2\_GR\_12 and for 16\_GR\_13, *blaCTX-M-64*, *blaOXA-436* and *strA*. Similar genes or gene families were identified  
253 when comparing DNA and direct RNA sequencing. Overall, genes were detected more readily via DNA rather than  
254 RNA sequencing, possibly due to a lack of RNA expression in the absence of the antibiotic to which resistance is  
255 encoded. There were only a few instances where RNA sequencing detected resistance more quickly than DNA  
256 sequencing which included *aac(3')-IIa* in 16\_GR\_13 and *sul2* and *catA1* in 2\_GR\_12. Similar results were apparent  
257 when investigating data yield rather than time (Supplementary Figure S4).

### 258 **Levels of expression of resistance genes**

259 RNA sequencing accumulated over approximately 40 hours yielded between 0.9 and 1.7 million reads for these  
260 isolates (Supplementary Figure S3). However, only 10 to 14% of these reads successfully passed base-calling which  
261 was similar when using either Albacore 2.1.1 or 2.2.7. The low proportion of base-called reads reflects the fact that  
262 base-calling algorithms have not yet been optimised for direct RNA sequencing, and even less so for bacterial RNA  
263 sequencing. When aligning passed reads to the final assembly,  $\geq 98\%$  of reads were mappable, however,  $\leq 40\%$  of  
264 these had a MAPQ score  $\geq 10$ . When all reads were aligned,  $\leq 22\%$  mapped to the genome and  $\leq 5\%$  exhibited a MAPQ  
265 score  $\geq 10$ . A proportion of these reads were found to map to rRNA including 1\_GR\_13 (18%), 2\_GR\_12 (37%),  
266 16\_GR\_13 (24%) and 20\_GR\_12 (23%). Overall, at least 58% of genes (with at least 1 read mapping to the gene)  
267 were identified to be expressed across isolates (1\_GR\_13 (68%), 2\_GR\_12 (58%), 16\_GR\_13 (75%) and 20\_GR\_12  
268 (69%).



269 Amongst the four isolates, levels of expression for resistance genes on the chromosome (*blaSHV-11*, *fosA* and  
270 *oqxAB*) were low ( $\leq 122$  counts per million (cpm) mapped reads) (Figure 2). The remaining resistance genes were  
271 located on plasmids. Resistance genes exhibiting high levels of expression (300 cpm) were apparent in 1\_GR\_13  
272 (*blaTEM-1B*, *blaVIM-27*, *sul1*, *aph(3')-Ia*), 2\_GR\_12 (*aac(6')-Ib*, *catA1*, *blaKPC-2*), 16\_GR\_13 (*aac(6')Ib-cr*,  
273 *aac(3)-IIa*, *blaCTX-M-15*, *blaTEM-1B*, *blaOXA-48*) and 20\_GR\_12 (*blaKPC-2*, *aac(6')Ib*). Counts for *aac(6')-Ib* and  
274 *aac(6')-Ib-cr* in 2\_GR\_12 and 20\_GR\_12 were grouped. The gene *aac(6')-Ib-cr* is a shortened version of *aac(6')-Ib*  
275 and both were identified in the same genome position, hence, only *aac(6')-Ib* is displayed in Figure 2. Relative  
276 expression did not differ significantly when analysing passed reads alone or all reads. All highly expressed genes were  
277 detected within 6 hours as per the real-time detection emulation. As anticipated, low levels of expression were  
278 observed for fosfomycin (*fosA*), tetracycline (*tet(A)*, *tet(B)*) and macrolide (*mph(A)*) resistance.

279 A subset of 11 resistance genes which represent resistance across various classes of antibiotics were investigated  
280 to validate differential gene expression in these RNA extractions via qRT-PCR. These included resistance towards  
281 aminoglycosides (*aac(6')Ib*, *strA*),  $\beta$ -lactams (*blaKPC-2*, *blaOXA-10*, *blaTEM-1*), phenicols (*cmlA1*), trimethoprim  
282 (*dfpA14*), fosfomycin (*fosA*), quinolone (*oqxA*), sulphonamides (*sul2*) and tetracyclines (*tet(A)*). A similar trend was  
283 observed between direct RNA sequencing and qRT-PCR results (Spearman's rank correlation coefficient: 0.83;  
284 Pearson correlation: 0.86) (Figure 3). The highest expression of a resistance gene was observed for *blaKPC-2* although  
285 only one copy was present in a lower copy number plasmid in 2\_GR\_12 and 20\_GR\_12 (Figure 2, Figure 3 and Table  
286 1). Additionally, low levels of expression for *fosA* and *tet(A)* were apparent despite exhibiting resistance towards  
287 fosfomycin and tetracycline (Figure 3, Supplementary Table S1). Direct RNA sequencing was unable to detect low  
288 levels of expression whilst qRT-PCR could detect these genes (Figure 3).

289 Across the transcriptome, antibiotic resistance genes were identified to harbour high differential expression  
290 between isolates (Figure 4). Virulence genes were comparable across these strains similar to all remaining or  
291 background genes. The top differentially expressed genes were determined (Supplementary Figure S5) and several  
292 were associated with polymyxin resistance pathways. Heightened expression was seen in polymyxin-resistant isolates  
293 1\_GR\_13, 2\_GR\_12, 16\_GR\_13 in comparison to the single susceptible isolate in particular, genes associated with  
294 Ara4N synthesis. These genes include 4-deoxy-4-formamido-L-arabinose-phosphoundecaprenol deformylase (ArnD),  
295 UDP-4-amino-4-deoxy-L-arabinose formyltransferase and UDP-4-amino-4-deoxy-L-arabinose-oxoglutarate  
296 aminotransferase.

### 297 **Transcriptional biomarkers for polymyxin resistance**

298 Three of the isolates harboured resistance towards polymyxins via disruptions in *mgrB* which included 1\_GR\_13,  
299 2\_GR\_12 and 16\_GR\_13. 1\_GR\_13. These isolates have an insertion sequence (IS) element, IS*Kpn26*-like, at  
300 nucleotide position 75 in the same orientation as *mgrB*. 2\_GR\_12 also contained an insertion at the same position,  
301 however, in the opposite orientation and additional mutations in *phoP* (A95S) and *phoQ* (N253T). 16\_GR\_13  
302 possessed an IS element, IS*IR*-like, 19 bp upstream of *mgrB*. Direct RNA sequencing revealed only low level  
303 expression of *mgrB* in isolates (1\_GR\_13 (78.4 cpm), 2\_GR\_12 (16.3 cpm), 16\_GR\_13 (0 cpm), 20\_GR\_12 (2.3  
304 cpm)). The expression levels of various genes associated with this pathway were verified via qRT-PCR which include

305 genes *phoP*, *phoQ*, *pmrA*, *pmrB*, *pmrC*, *pmrD*, *pmrE*, *pmrH* and *pmrK* (Figure 5). Direct RNA sequencing revealed a  
306 slight increase in transcription of *phoPQ* ( $\geq 2$ -fold) relative to the expression in 20\_GR\_12. A  $\geq 13$ -fold increase in  
307 expression was observed for *pmrH* and  $\geq 8$ -fold elevation for *pmrK*. Similar trends for expression were also reported  
308 using qRT-PCR (Figure 5B).

309

## 310 DISCUSSION

311 XDR *K. pneumoniae* pose as a major threat to modern medicine with rapid diagnostics critical to discern appropriate  
312 treatment options (1,6). The MinION sequencing technology employed in this study has great potential to detect  
313 antibiotic resistance in a timely manner, as shown with four XDR *K. pneumoniae* isolates. This method was able to  
314 resolve both the assembly of plasmids harbouring high levels of resistance (through DNA sequencing) and the  
315 expression from the resistome in the absence of antibiotic treatment (through RNA sequencing).

316 The ability for ONT to sequence long fragments of DNA has significantly aided the assembly of bacterial  
317 genomes and plasmids (16-18). In this study, multiple megaplasmids ( $\geq 100$  kbp) were identified which were  
318 previously unresolved via Illumina sequencing (24). These harboured replicons IncA/C2 or a dual replicon, IncFIIK  
319 and IncFIB. The IncA/C, IncF and IncN plasmids have been commonly associated with multidrug resistance (46).  
320 Although several plasmids in this study revealed similarity to previously reported isolates via NCBI, various sequences  
321 deviated. In particular, the IncA/C2 plasmid exhibited multiple regions unique to these isolates. Several IncA/C2  
322 megaplasmids have been previously described which harbour various resistance genes, however, the extent of  
323 resistance in our study has yet to be unveiled (47,48). Prior studies have shown the IncFIIK and IncFIB replicons to  
324 localise on the same plasmid and also megaplasmids with multidrug resistance (6). The IncFIB<sub>pQII</sub> plasmid in this study  
325 contained various  $\beta$ -lactam resistance genes (*blaKPC-2*, *blaOXA-9*, *blaTEM-1A*) which has been identified previously  
326 (49). Similarly, *blaOXA-48* segregated with the IncL/M replicon (50,51), however, deviations in this plasmid were  
327 identified.

328 The real-time analysis capability entailed in MinION sequencing has the potential to rapidly determine the  
329 antibiotic resistance profile. Previously, this device has been utilised to rapidly assemble bacterial genomes, discern  
330 species and detect antibiotic resistance (12-15). This study investigated the potential time required to discern resistance  
331 via a real-time emulation as previously described (17). The majority ( $\geq 70\%$ ) of resistance genes were detected via  
332 DNA sequencing within 2 hours. However, several genes that were not identified in the final assembly were apparent  
333 after 2 hours. This may be attributed to the high similarity ( $\geq 80\%$ ) amongst various genes, in particular, those  
334 associated with aminoglycoside,  $\beta$ -lactam, rifampicin and phenicol resistance. Furthermore, the error rate associated  
335 with ONT sequencing and the accumulation of these errors over time may result in the false detection of these genes.  
336 Nanopore DNA sequencing currently has an accuracy ranging from 80 to 90% which limits its ability to detect  
337 mutations (17). Various resistance genes only differ by a few nucleotides which significantly impacts the resistance  
338 phenotype and the antibiotics which can be utilised to treat these infections. Furthermore, direct RNA sequencing has  
339 an average error rate of 12% (21). Hence, it is essential for the technology to increase its accuracy in order to correctly  
340 and rapidly diagnose antibiotic resistance.

341 Investigating the transcriptome of these isolates can potentially elucidate the correlation between genotype and  
342 the subsequent resistant phenotype. One of the advantages of RNA sequencing is that it can identify conditions in  
343 which a resistance gene is present but not expressed, potentially resulting in a susceptible phenotype. However, if  
344 expression is only induced in the presence of an antibiotic, the absence of RNA transcripts may falsely suggest  
345 susceptibility. Direct RNA sequencing revealed high levels of transcription from genes associated with  
346 aminoglycoside,  $\beta$ -lactam, sulphonamide and trimethoprim resistance within 6 hours. The detection of quinolone,  
347 rifampicin, and phenicol resistance correlated to the levels of transcription within samples. All isolates exhibited low  
348 levels of expression for fosfomycin, macrolide and tetracycline resistance, despite exhibiting phenotypic resistance to  
349 fosfomycin and tetracycline. Whether this transcription is due to prior exposure to these antibiotics in the clinic and  
350 the longevity of this expression post exposure warrants further investigation. The changes in transcription levels in  
351 response to antibiotic exposure also need to be assessed in future experiments. Furthermore, the time required to detect  
352 resistance may be hindered by the slower translocation speed associated with direct RNA sequencing (70 bases/  
353 second) compared to DNA sequencing (450 bases/ second). Furthermore, insufficient rRNA depletion and low base-  
354 calling of data could be impacting the detection of this low level expression.

355 Another variable to consider when evaluating differential expression is the operon or promoter which can further  
356 be explored via cloning. In particular, the highest levels of expression were observed for *blaKPC-2* in 2\_GR\_12 and  
357 20\_GR\_12. Alterations in the promoter region have previously been reported to influence high levels of expression  
358 (52). Furthermore, despite low levels of transcription for fosfomycin (*fosA*) and tetracycline (*tet(A)*, *tet(G)*),  
359 phenotypically these isolates consistently retain resistance (24). FosA, an enzyme involved in the degradation of  
360 fosfomycin, is commonly encoded chromosomally in *K. pneumoniae* and a combination of expression and enzymatic  
361 activity contributes to resistance (53). Genes *tet(A)* and *tet(G)* encode efflux pumps which, in the absence of  
362 tetracycline, are lowly expressed (54). Detecting inducible resistance such as tetracycline resistance highlights one of  
363 the advantages of investigating the transcriptome. Additionally, copy number of plasmids can further alter the levels  
364 of expression detected for these resistance genes.

365 In this study we also investigated pathways attributed to polymyxin resistance. Three of these strains exhibited  
366 an IS element upstream of within *mgrB*, the negative regulator of PhoPQ (25,26). Elevated expression was apparent  
367 for *phoPQ* and also the *pmrHFIJKLM* operon in our polymyxin-resistant isolates harbouring a disruption in *mgrB*.  
368 This has previously been witnessed for other *K. pneumoniae* isolates harbouring *mgrB* disruptions and is a potential  
369 transcriptional marker for polymyxin resistance (27,43,55,56). However, this study is limited to four isolates and one  
370 mechanism associated with polymyxin resistance. Other pathways have previously been identified including the role  
371 of other TCSs such as CrrAB (57). The ability to use relative expression of key genes to detect polymyxin resistance  
372 requires further validation, including an increased sample size of resistant and non-resistant isolates. Furthermore,  
373 additional functional experiments such as complementation assays would be required in order to validate the  
374 contribution of a certain mutation to the transcriptome and subsequent resistance.

375 This study has utilised MinION sequencing to assemble four XDR *K. pneumoniae* genomes and has revealed  
376 several unique plasmids harbouring multidrug resistance. The vast majority of this resistance was detectable within 2  
377 hours of sequencing, though a number of resistance genes were identified that were not present in the final assembly.

378 Exploiting this analysis in real-time would allow for a rapid diagnostic, however, the presence of a resistance gene  
379 does not necessarily indicate resistance is conferred and requires additional phenotypic characterisation. This research  
380 also established a methodology and analysis for bacterial direct RNA sequencing. The differential expression of  
381 resistance genes were successfully detected via this technology and can be exploited for bacterial transcriptomics.  
382 Once base-calling algorithms have been optimised, this could allow for a whole transcriptome interrogation of full  
383 length transcripts regulated by operons, where more than one gene is co-expressed in a transcript, and the evaluation  
384 of the poorly characterised epitranscriptome. This research established a methodology and analysis for bacterial direct  
385 RNA sequencing. The differential expression of resistance genes were successfully detected via this technology and  
386 can be exploited for bacterial transcriptomics. Overall, this study has begun to unravel the association between  
387 genotype, transcription and subsequent resistant phenotype in these XDR *K. pneumoniae* clinical isolates, establishing  
388 the groundwork for developing a diagnostic that can rapidly determine bacterial resistance profiles.

389

#### 390 **ACKNOWLEDGEMENTS**

391 We would like to acknowledge Dr Ilias Karaiskos and Dr Helen Giamarellou for providing the bacterial strains in this  
392 study. We also acknowledge Dr Evangelos Bellos for his guidance on the RNA sequencing analysis and Dr Devika  
393 Ganesamoorthy for the initial advice on the direct RNA sequencing library preparation.

#### 394 **FUNDING**

395 LC is an NHMRC career development Fellow APP1103384). MAC is an NHMRC Principal Research Fellow  
396 (APP1059354) and currently holds a fractional Professorial Research Fellow appointment at the University of  
397 Queensland with his remaining time as CEO of Inflazome Ltd. a company headquartered in Dublin, Ireland that is  
398 developing drugs to address clinical unmet needs in inflammatory disease by targeting the inflammasome. MEP is an  
399 Australian Postgraduate Award scholar. MATB is supported in part by a Wellcome Trust Strategic Award  
400 104797/Z/14/Z. This work was supported by the Institute for Molecular Bioscience Centre for Superbug Solutions  
401 (610246).

#### 402 **CONFLICT OF INTEREST**

403 The authors declare that there are no conflicts of interest.

404

405 **REFERENCES**

- 406 1. Martin, R.M. and Bachman, M.A. (2018) Colonization, Infection, and the Accessory Genome of *Klebsiella*  
407 *pneumoniae*. *Front Cell Infect. Microbiol.*, **8**, 4.
- 408 2. Magill, S.S., Edwards, J.R., Bamberg, W., Beldavs, Z.G., Dumyati, G., Kainer, M.A., Lynfield, R., Maloney,  
409 M., McAllister-Hollod, L., Nadle, J. *et al.* (2014) Multistate point-prevalence survey of health care-associated  
410 infections. *N. Engl. J. Med.*, **370**, 1198-1208.
- 411 3. Kalanuria, A.A., Ziai, W. and Mirski, M. (2014) Ventilator-associated pneumonia in the ICU. *Crit. Care*, **18**,  
412 208.
- 413 4. Talha, K.A., Hasan, Z., Selina, F. and Palash, M.I. (2009) Organisms associated with ventilator associated  
414 pneumonia in intensive care unit. *Mymensingh Med. J.*, **18**, S93-97.
- 415 5. Podschun, R. and Ullmann, U. (1998) *Klebsiella spp.* as nosocomial pathogens: epidemiology, taxonomy,  
416 typing methods, and pathogenicity factors. *Clin. Microbiol. Rev.*, **11**, 589-603.
- 417 6. Navon-Venezia, S., Kondratyeva, K. and Carattoli, A. (2017) *Klebsiella pneumoniae*: a major worldwide  
418 source and shuttle for antibiotic resistance. *FEMS Microbiol. Rev.*, **41**, 252-275.
- 419 7. Karaiskos, I. and Giamarellou, H. (2014) Multidrug-resistant and extensively drug-resistant Gram-negative  
420 pathogens: current and emerging therapeutic approaches. *Expert Opin. Pharmacother.*, **15**, 1351-1370.
- 421 8. Chen, L., Todd, R., Kiehlbauch, J., Walters, M. and Kallen, A. (2017) Notes from the Field: Pan-Resistant  
422 New Delhi Metallo-Beta-Lactamase-Producing *Klebsiella pneumoniae* - Washoe County, Nevada, 2016.  
423 *MMWR Morb. Mortal Wkly Rep.*, **66**, 33.
- 424 9. Zowawi, H.M., Forde, B.M., Alfaresi, M., Alzarouni, A., Farahat, Y., Chong, T.M., Yin, W.F., Chan, K.G.,  
425 Li, J., Schembri, M.A. *et al.* (2015) Stepwise evolution of pandrug-resistance in *Klebsiella pneumoniae*. *Sci.*  
426 *Rep.*, **5**, 15082.
- 427 10. Sommer, M.O.A., Munck, C., Toft-Kehler, R.V. and Andersson, D.I. (2017) Prediction of antibiotic  
428 resistance: time for a new preclinical paradigm? *Nat. Rev. Microbiol.*, **15**, 689-696.
- 429 11. Gardy, J.L. and Loman, N.J. (2018) Towards a genomics-informed, real-time, global pathogen surveillance  
430 system. *Nat. Rev. Genet.*, **19**, 9-20.
- 431 12. Lemon, J.K., Khil, P.P., Frank, K.M. and Dekker, J.P. (2017) Rapid Nanopore Sequencing of Plasmids and  
432 Resistance Gene Detection in Clinical Isolates. *J. Clin. Microbiol.*, **55**, 3530-3543.
- 433 13. Votintseva, A.A., Bradley, P., Pankhurst, L., Del Ojo Elias, C., Loose, M., Nilgiriwala, K., Chatterjee, A.,  
434 Smith, E.G., Sanderson, N., Walker, T.M. *et al.* (2017) Same-Day Diagnostic and Surveillance Data for  
435 Tuberculosis via Whole-Genome Sequencing of Direct Respiratory Samples. *J. Clin. Microbiol.*, **55**, 1285-  
436 1298.
- 437 14. Cao, M.D., Ganesamoorthy, D., Elliott, A.G., Zhang, H., Cooper, M.A. and Coin, L.J. (2016) Streaming  
438 algorithms for identification of pathogens and antibiotic resistance potential from real-time MinION(TM)  
439 sequencing. *Gigascience*, **5**, 32.

- 440 15. Quick, J., Ashton, P., Calus, S., Chatt, C., Gossain, S., Hawker, J., Nair, S., Neal, K., Nye, K., Peters, T. *et al.* (2015) Rapid draft sequencing and real-time nanopore sequencing in a hospital outbreak of *Salmonella*. *Genome Biol.*, **16**, 114.
- 441
- 442
- 443 16. Wick, R.R., Judd, L.M., Gorrie, C.L. and Holt, K.E. (2017) Completing bacterial genome assemblies with multiplex MinION sequencing. *Microb. Genom.*, **3**, e000132.
- 444
- 445 17. Li, R., Xie, M., Dong, N., Lin, D., Yang, X., Wong, M.H.Y., Chan, E.W. and Chen, S. (2018) Efficient generation of complete sequences of MDR-encoding plasmids by rapid assembly of MinION barcoding sequencing data. *Gigascience*, **7**, 1-9.
- 446
- 447
- 448 18. George, S., Pankhurst, L., Hubbard, A., Votintseva, A., Stoesser, N., Sheppard, A.E., Mathers, A., Norris, R., Navickaite, I., Eaton, C. *et al.* (2017) Resolving plasmid structures in Enterobacteriaceae using the MinION nanopore sequencer: assessment of MinION and MinION/Illumina hybrid data assembly approaches. *Microb. Genom.*, **3**, e000118.
- 449
- 450
- 451
- 452 19. Garalde, D.R., Snell, E.A., Jachimowicz, D., Sipos, B., Lloyd, J.H., Bruce, M., Pantic, N., Admassu, T., James, P., Warland, A. *et al.* (2018) Highly parallel direct RNA sequencing on an array of nanopores. *Nat. Methods*, **15**, 201-206.
- 453
- 454
- 455 20. Ozsolak, F. and Milos, P.M. (2011) RNA sequencing: advances, challenges and opportunities. *Nat. Rev. Genet.*, **12**, 87-98.
- 456
- 457 21. Jenjaroenpun, P., Wongsurawat, T., Pereira, R., Patumcharoenpol, P., Ussery, D.W., Nielsen, J. and Nookaew, I. (2018) Complete genomic and transcriptional landscape analysis using third-generation sequencing: a case study of *Saccharomyces cerevisiae* CEN.PK113-7D. *Nucleic Acids Res.*, **46**, e38.
- 458
- 459
- 460 22. Moldovan, N., Tombacz, D., Szucs, A., Csabai, Z., Balazs, Z., Kis, E., Molnar, J. and Boldogkoi, Z. (2018) Third-generation Sequencing Reveals Extensive Polycistronism and Transcriptional Overlapping in a *Baculovirus*. *Sci. Rep.*, **8**, 8604.
- 461
- 462
- 463 23. Sorek, R. and Cossart, P. (2010) Prokaryotic transcriptomics: a new view on regulation, physiology and pathogenicity. *Nat. Rev. Genet.*, **11**, 9-16.
- 464
- 465 24. Pitt, M.E., Elliott, A.G., Cao, M.D., Ganesamoorthy, D., Karaikos, I., Giamarellou, H., Abboud, C.S., Blaskovich, M.A.T., Cooper, M.A. and Coin, L.J.M. (2018) Multifactorial chromosomal variants regulate polymyxin resistance in extensively drug-resistant *Klebsiella pneumoniae*. *Microb. Genom.*, doi: 10.1099/mgen.1090.000158.
- 466
- 467
- 468
- 469 25. Cannatelli, A., Giani, T., D'Andrea, M.M., Di Pilato, V., Arena, F., Conte, V., Tryfinopoulou, K., Vatopoulos, A. and Rossolini, G.M. (2014) MgrB inactivation is a common mechanism of colistin resistance in KPC-producing *Klebsiella pneumoniae* of clinical origin. *Antimicrob. Agents Chemother.*, **58**, 5696-5703.
- 470
- 471
- 472 26. Olaitan, A.O., Diene, S.M., Kempf, M., Berrazeg, M., Bakour, S., Gupta, S.K., Thongmalayvong, B., Akkhavong, K., Somphavong, S., Paboriboune, P. *et al.* (2014) Worldwide emergence of colistin resistance in *Klebsiella pneumoniae* from healthy humans and patients in Lao PDR, Thailand, Israel, Nigeria and France owing to inactivation of the PhoP/PhoQ regulator mgrB: an epidemiological and molecular study. *Int. J. Antimicrob. Agents*, **44**, 500-507.
- 473
- 474
- 475
- 476



- 477 27. Wright, M.S., Suzuki, Y., Jones, M.B., Marshall, S.H., Rudin, S.D., van Duin, D., Kaye, K., Jacobs, M.R.,  
478 Bonomo, R.A. and Adams, M.D. (2015) Genomic and transcriptomic analyses of colistin-resistant clinical  
479 isolates of *Klebsiella pneumoniae* reveal multiple pathways of resistance. *Antimicrob. Agents Chemother.*,  
480 **59**, 536-543.
- 481 28. Helander, I.M., Kato, Y., Kilpelainen, I., Kostianen, R., Lindner, B., Nummila, K., Sugiyama, T. and  
482 Yokochi, T. (1996) Characterization of lipopolysaccharides of polymyxin-resistant and polymyxin-sensitive  
483 *Klebsiella pneumoniae* O3. *Eur. J. Biochem.*, **237**, 272-278.
- 484 29. Velkov, T., Deris, Z.Z., Huang, J.X., Azad, M.A., Butler, M., Sivanesan, S., Kaminskas, L.M., Dong, Y.D.,  
485 Boyd, B., Baker, M.A. *et al.* (2014) Surface changes and polymyxin interactions with a resistant strain of  
486 *Klebsiella pneumoniae*. *Innate Immun.*, **20**, 350-363.
- 487 30. Zankari, E., Hasman, H., Cosentino, S., Vestergaard, M., Rasmussen, S., Lund, O., Aarestrup, F.M. and  
488 Larsen, M.V. (2012) Identification of acquired antimicrobial resistance genes. *J. Antimicrob. Chemother.*,  
489 **67**, 2640-2644.
- 490 31. Lassmann, T., Frings, O. and Sonnhammer, E.L. (2009) Kalign2: high-performance multiple alignment of  
491 protein and nucleotide sequences allowing external features. *Nucleic Acids Res.*, **37**, 858-865.
- 492 32. Allison, L., Wallace, C.S. and Yee, C.N. (1990) When is a string like a string? In: Artificial Intelligence and  
493 Mathematics. *Ft. Lauderdale FL*.
- 494 33. Bankevich, A., Nurk, S., Antipov, D., Gurevich, A.A., Dvorkin, M., Kulikov, A.S., Lesin, V.M., Nikolenko,  
495 S.I., Pham, S., Prjibelski, A.D. *et al.* (2012) SPAdes: a new genome assembly algorithm and its applications  
496 to single-cell sequencing. *J. Comput. Biol.*, **19**, 455-477.
- 497 34. Cao, M.D., Nguyen, S.H., Ganesamoorthy, D., Elliott, A.G., Cooper, M.A. and Coin, L.J. (2017) Scaffolding  
498 and completing genome assemblies in real-time with nanopore sequencing. *Nat. Commun.*, **8**, 14515.
- 499 35. Wick, R.R., Judd, L.M., Gorrie, C.L. and Holt, K.E. (2017) Unicycler: Resolving bacterial genome  
500 assemblies from short and long sequencing reads. *PLoS Comput. Biol.*, **13**, e1005595.
- 501 36. Koren, S., Walenz, B.P., Berlin, K., Miller, J.R., Bergman, N.H. and Phillippy, A.M. (2017) Canu: scalable  
502 and accurate long-read assembly via adaptive k-mer weighting and repeat separation. *Genome Res.*, **27**, 722-  
503 736.
- 504 37. Li, H. (2016) Minimap and miniasm: fast mapping and *de novo* assembly for noisy long sequences.  
505 *Bioinformatics*, **32**, 2103-2110.
- 506 38. Vaser, R., Sovic, I., Nagarajan, N. and Sikic, M. (2017) Fast and accurate *de novo* genome assembly from  
507 long uncorrected reads. *Genome Res.*, **27**, 737-746.
- 508 39. Darling, A.E., Tritt, A., Eisen, J.A. and Facciotti, M.T. (2011) Mauve assembly metrics. *Bioinformatics*, **27**,  
509 2756-2757.
- 510 40. Aziz, R.K., Bartels, D., Best, A.A., DeJongh, M., Disz, T., Edwards, R.A., Formsma, K., Gerdes, S., Glass,  
511 E.M., Kubal, M. (2008) The RAST Server: rapid annotations using subsystems technology. *BMC Genomics*,  
512 **9**,75.

- 513 41. Carattoli, A., Zankari, E., Garcia-Fernandez, A., Voldby Larsen, M., Lund, O., Villa, L., Moller Aarestrup,  
514 F. and Hasman, H. (2014) *In silico* detection and typing of plasmids using PlasmidFinder and plasmid  
515 multilocus sequence typing. *Antimicrob. Agents Chemother.*, **58**, 3895-3903.
- 516 42. Quinlan, A.R. (2014) BEDTools: The Swiss-Army Tool for Genome Feature Analysis. *Curr. Protoc.*  
517 *Bioinformatics*, **47**, 11.12.11-34.
- 518 43. Cannatelli, A., D'Andrea, M.M., Giani, T., Di Pilato, V., Arena, F., Ambretti, S., Gaibani, P. and Rossolini,  
519 G.M. (2013) *In vivo* emergence of colistin resistance in *Klebsiella pneumoniae* producing KPC-type  
520 carbapenemases mediated by insertional inactivation of the PhoQ/PhoP mgrB regulator. *Antimicrob Agents*  
521 *Chemother*, **57**, 5521-5526.
- 522 44. Robinson, J.T., Thorvaldsdottir, H., Winckler, W., Guttman, M., Lander, E.S., Getz, G. and Mesirov, J.P.  
523 (2011) Integrative genomics viewer. *Nat. Biotechnol.*, **29**, 24-26.
- 524 45. Livak, K.J. and Schmittgen, T.D. (2001) Analysis of relative gene expression data using real-time  
525 quantitative PCR and the 2(-Delta Delta C(T)) Method. *Methods*, **25**, 402-408.
- 526 46. Carattoli, A. (2009) Resistance plasmid families in Enterobacteriaceae. *Antimicrob. Agents Chemother.*, **53**,  
527 2227-2238.
- 528 47. Desmet, S., Nepal, S., van Dijl, J.M., Van Ranst, M., Chlebowicz, M.A., Rossen, J.W., Van Houdt, J.K.J.,  
529 Maes, P., Lagrou, K. and Bathoorn, E. (2018) Antibiotic Resistance Plasmids Cointegrated into a  
530 Megaplasmid Harboring the *blaOXA-427* Carbapenemase Gene. *Antimicrob. Agents Chemother.*, **62**, pii:  
531 e01448-17.
- 532 48. Papagiannitsis, C.C., Dolejska, M., Izdebski, R., Giakkoupi, P., Skalova, A., Chudejova, K., Dobiasova, H.,  
533 Vatopoulos, A.C., Derde, L.P., Bonten, M.J. *et al.* (2016) Characterisation of IncA/C2 plasmids carrying an  
534 In416-like integron with the *blaVIM-19* gene from *Klebsiella pneumoniae* ST383 of Greek origin. *Int. J.*  
535 *Antimicrob. Agents*, **47**, 158-162.
- 536 49. Chen, L., Chavda, K.D., Melano, R.G., Jacobs, M.R., Koll, B., Hong, T., Rojzman, A.D., Levi, M.H.,  
537 Bonomo, R.A. and Kreiswirth, B.N. (2014) Comparative genomic analysis of KPC-encoding pKpQIL-like  
538 plasmids and their distribution in New Jersey and New York Hospitals. *Antimicrob. Agents Chemother.*, **58**,  
539 2871-2877.
- 540 50. Poirel, L., Bonnin, R.A. and Nordmann, P. (2012) Genetic features of the widespread plasmid coding for the  
541 carbapenemase OXA-48. *Antimicrob. Agents Chemother.*, **56**, 559-562.
- 542 51. Potron, A., Poirel, L. and Nordmann, P. (2014) Derepressed transfer properties leading to the efficient spread  
543 of the plasmid encoding carbapenemase OXA-48. *Antimicrob. Agents Chemother.*, **58**, 467-471.
- 544 52. Cheruvanky, A., Stoesser, N., Sheppard, A.E., Crook, D.W., Hoffman, P.S., Weddle, E., Carroll, J., Sifri,  
545 C.D., Chai, W., Barry, K. *et al.* (2017) Enhanced *Klebsiella pneumoniae* Carbapenemase Expression from a  
546 Novel Tn4401 Deletion. *Antimicrob. Agents Chemother.*, **61**.
- 547 53. Klontz, E.H., Tomich, A.D., Gunther, S., Lemkul, J.A., Deredge, D., Silverstein, Z., Shaw, J.F., McElheny,  
548 C., Doi, Y., Wintrobe, P.L. *et al.* (2017) Structure and Dynamics of FosA-Mediated Fosfomycin Resistance  
549 in *Klebsiella pneumoniae* and *Escherichia coli*. *Antimicrob. Agents Chemother.*, **61**.

- 550 54. Saenger, W., Orth, P., Kisker, C., Hillen, W. and Hinrichs, W. (2000) The Tetracycline Repressor-A  
551 Paradigm for a Biological Switch. *Angew Chem. Int. Ed. Engl.*, **39**, 2042-2052.
- 552 55. Cheng, Y.H., Lin, T.L., Pan, Y.J., Wang, Y.P., Lin, Y.T. and Wang, J.T. (2015) Colistin resistance  
553 mechanisms in *Klebsiella pneumoniae* strains from Taiwan. *Antimicrob. Agents Chemother.*, **59**, 2909-2913.
- 554 56. Haeili, M., Javani, A., Moradi, J., Jafari, Z., Feizabadi, M.M. and Babaei, E. (2017) MgrB Alterations  
555 Mediate Colistin Resistance in *Klebsiella pneumoniae* Isolates from Iran. *Front Microbiol.*, **8**, 2470.
- 556 57. Baron, S., Hadjadj, L., Rolain, J.M., Olaitan, A.O. (2017) Molecular mechanisms of polymyxin resistance:  
557 knowns and unknowns. *Int. J. Antimicrob. Agents*, **48**, 583-591.

**Table 1.** Final assembly of XDR *K. pneumoniae* isolates and location of antibiotic resistance genes

| Isolate  | ST  | Contig | Length (bp)    | Coverage | Contig ID <sup>a</sup>                               | Resistance Genes <sup>b</sup>                                                                                                                     |
|----------|-----|--------|----------------|----------|------------------------------------------------------|---------------------------------------------------------------------------------------------------------------------------------------------------|
| 1_GR_13  | 147 | 1      | <b>5181675</b> | 1        | C                                                    | <i>blaSHV-11, fosA, oqxA, oqxB</i>                                                                                                                |
|          |     | 2      | <b>192771</b>  | 1.95     | P: IncA/C2                                           | <i>aadA1, ant(2'')-Ia, aph(6)-Id, ARR-2, blaOXA-10, blaTEM-1B, blaVEB-1, cmlA1, dfrA14, dfrA23, rmtB, strA, sul1, sul2, tet(A), tet(G)</i>        |
|          |     | 3      | <b>168873</b>  | 2        | P: IncFIB <sub>pKpn3</sub> , IncFII <sub>pKP91</sub> | <i>aadA24, aph(3')-Ia, aph(6)-Id, dfrA1, dfrA14, strA</i>                                                                                         |
|          |     | 4      | <b>108879</b>  | 1.53     | P: IncFIB <sub>pKPHS1</sub>                          | -                                                                                                                                                 |
|          |     | 5      | <b>55018</b>   | 14.10    | -                                                    | -                                                                                                                                                 |
|          |     | 6      | <b>53495</b>   | 2.36     | P: IncR, IncN                                        | <i>aadA24, aph(3')-Ia, aph(6)-Id, blaVIM-27, dfrA1, mph(A), strA, sul1</i>                                                                        |
| 2_GR_12  | 258 | 1      | <b>5466424</b> | 1        | C                                                    | <i>blaSHV-11, fosA, oqxA, oqxB</i>                                                                                                                |
|          |     | 2      | 197872         | 1.3      | P: IncFIB <sub>pKpn3</sub> , IncFIIK                 | <i>aadA2, aph(3')-Ia, catA1, dfrA12, mph(A), sul1</i>                                                                                             |
|          |     | 3      | 175636         | 1.49     | P: IncA/C2                                           | <i>aadA1, ant(2'')-Ia, aph(3'')-Ib, aph(6)-Id, ARR-2, blaOXA-10, blaTEM-1A, blaVEB-1, cmlA1, dfrA14, dfrA23, rmtB, sul1, sul2, tet(A), tet(G)</i> |
|          |     | 4      | 95481          | 1.61     | P: IncFIB <sub>pQil</sub>                            | <i>blaKPC-2, blaOXA-9, blaTEM-1A</i>                                                                                                              |
|          |     | 5      | <b>43380</b>   | 1.91     | P: IncX3                                             | <i>blaSHV-12</i>                                                                                                                                  |
|          |     | 6      | <b>13841</b>   | 4        | P: ColRNAI                                           | <i>aac(6')-Ib, aac(6')Ib-cr</i>                                                                                                                   |
| 16_GR_13 | 11  | 1      | <b>5426917</b> | 1        | C                                                    | <i>blaSHV-11, fosA, oqxA, oqxB</i>                                                                                                                |
|          |     | 2      | <b>187670</b>  | 0.88     | P: IncFIB <sub>pKpn3</sub> ; IncFIIK                 | <i>aac(3)-IIa, aac(6')Ib-cr, aadA2, aph(3')-Ia, blaCTX-M-15, blaOXA-1, catB4, dfrA12, mph(A), sul1</i>                                            |
|          |     | 3      | <b>155161</b>  | 0.99     | P: IncA/ C2                                          | <i>aadA1, ant(2'')-Ia, aph(3'')-Ib, aph(6)-Id, ARR-2, blaOXA-10, blaTEM-1B, blaVEB-1, cmlA1, rmtB, sul1, sul2, tet(A), tet(G)</i>                 |
|          |     | 4      | <b>63589</b>   | 1.49     | P: IncL/ M <sub>pOXA-48</sub>                        | <i>blaOXA-48</i>                                                                                                                                  |
|          |     | 5      | <b>5234</b>    | 188.49   | -                                                    | -                                                                                                                                                 |
|          |     | 6      | <b>4940</b>    | 97.77    | P: ColRNAI                                           | -                                                                                                                                                 |
| 20_GR_12 | 258 | 1      | <b>5395894</b> | 1        | C                                                    | <i>blaSHV-11, fosA, oqxA, oqxB</i>                                                                                                                |
|          |     | 2      | <b>170467</b>  | 1.77     | P: IncFIB <sub>pKpn3</sub> ; IncFIIK                 | <i>aph(3')-Ia, blaKPC-2, blaOXA-9, blaTEM-1A</i>                                                                                                  |
|          |     | 3      | <b>50979</b>   | 1.42     | P: IncN                                              | <i>aph(3'')-Ib, aph(6)-Id, blaTEM-1A, dfrA14, sul2, tet(A)</i>                                                                                    |
|          |     | 4      | <b>43380</b>   | 1.78     | P: IncX3                                             | <i>blaSHV-12</i>                                                                                                                                  |
|          |     | 5      | <b>13841</b>   | 10.82    | P: ColRNAI                                           | <i>aac(6')-Ib, aac(6')Ib-cr</i>                                                                                                                   |

<sup>a</sup> Contig identity indicating chromosome (C) and plasmid (P: replicon (determined via PlasmidFinder 1.3)) sequences

<sup>b</sup> Resistance genes determined via ResFinder 3.0 and displayed in alphabetical order. **Bold** indicates a circular contig.

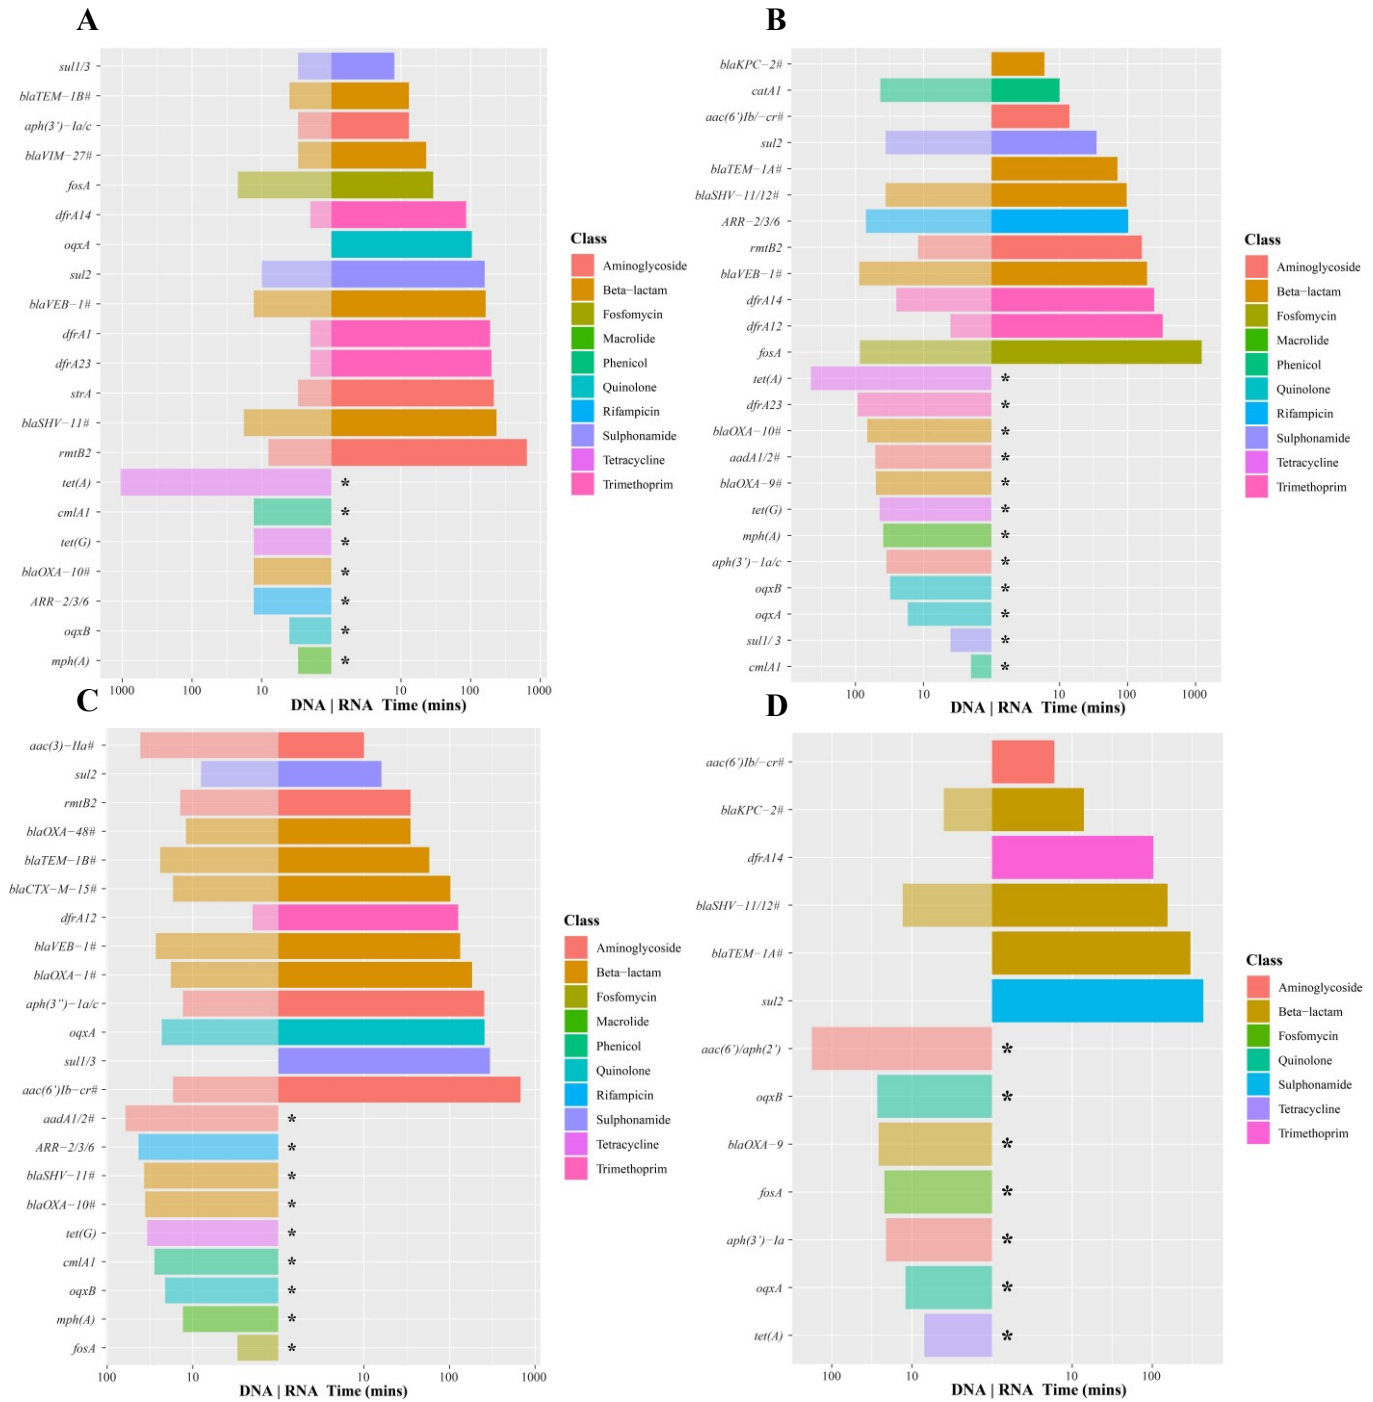

**Figure 1.** Time required to detect antibiotic resistance genes via the real-time emulation analysis using MinION DNA sequencing and direct RNA sequencing data. (A) 1\_GR\_13, (B) 2\_GR\_12, (C) 16\_GR\_13 and (D) 20\_GR\_12. Legend colours identify the class of antibiotic to which the gene confers resistance, / on y-axis indicates reads detected more than one resistance gene and # is a family of genes detected (>3). An asterisk (\*) indicates the inability for direct RNA sequencing to detect this gene. Albacore 2.2.7 base-called sequences were used and all reads (pass and fail) were included in this analysis.

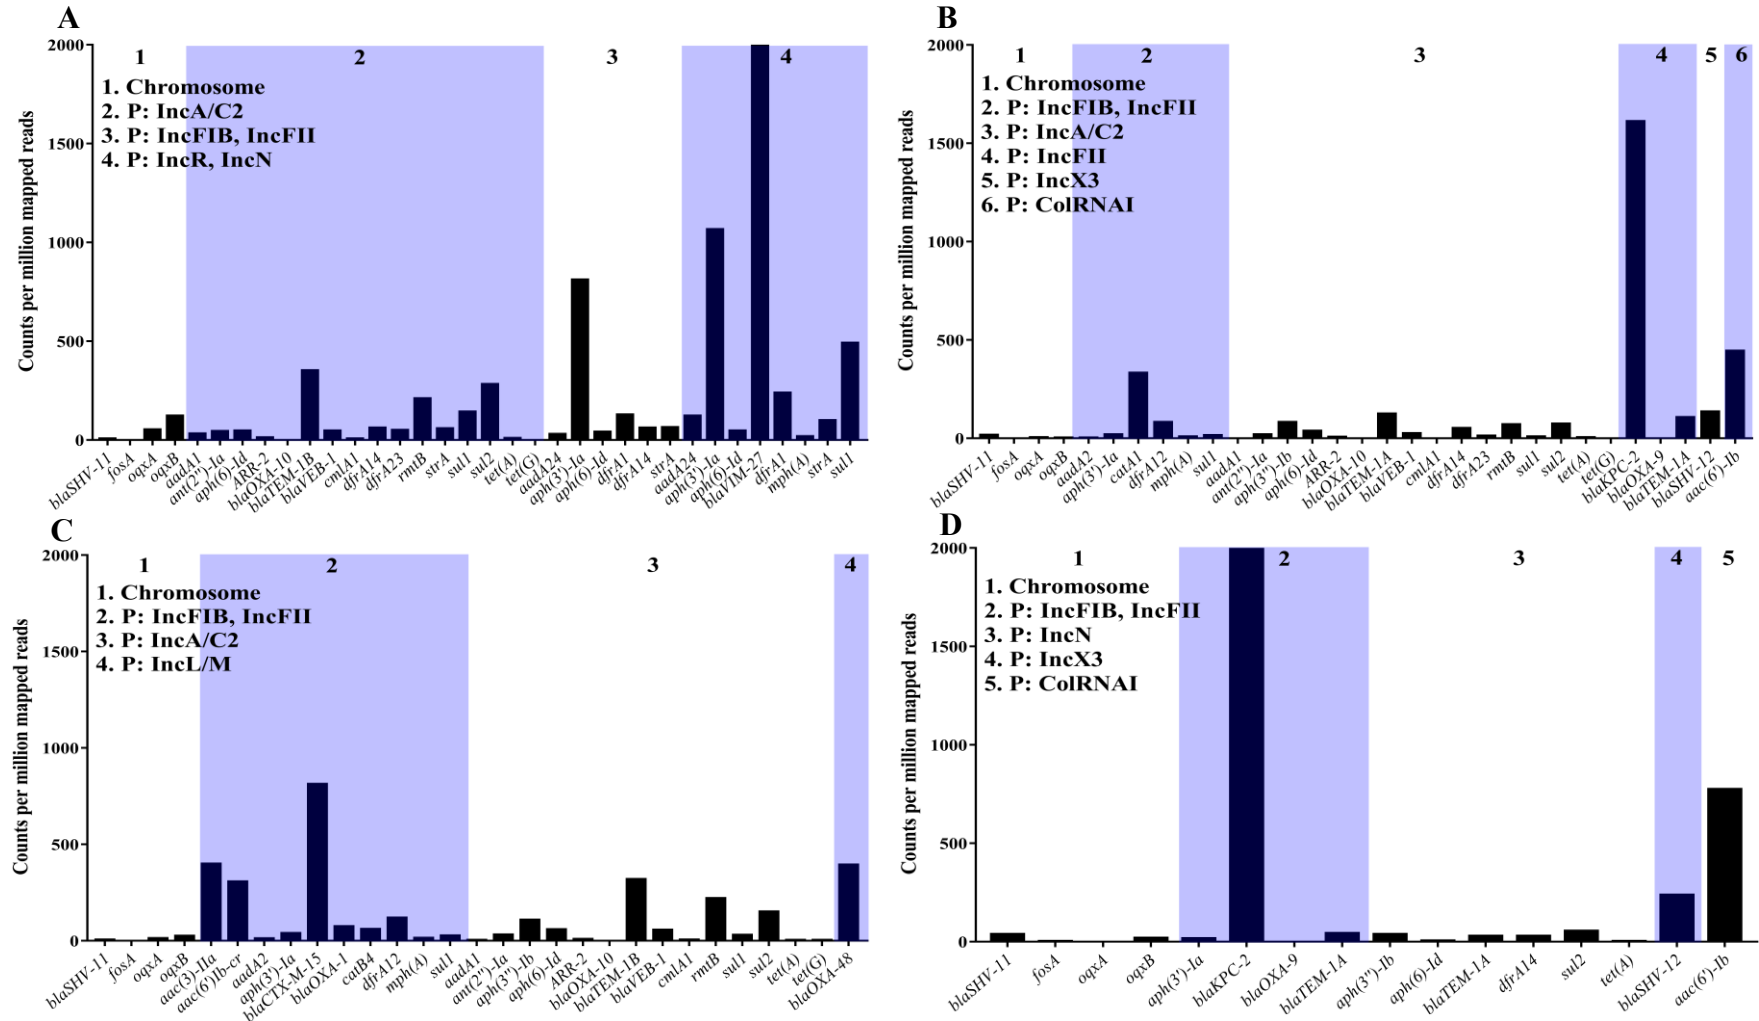

**Figure 2.** Expression of resistance genes determined using counts per million mapped reads. Due to differing levels of rRNA depletions across samples, reads mapping to rRNA were removed. Strains investigated include (A) 1\_GR\_13, (B) 2\_GR\_12, (C) 16\_GR\_13 and (D) 20\_GR\_12. X-axis depicts the resistance genes and are grouped based on the location in the genome where P indicates a plasmid followed by replicon identity. Albacore 2.2.7 base-called sequences were used and all reads (pass and fail) were included in this analysis.



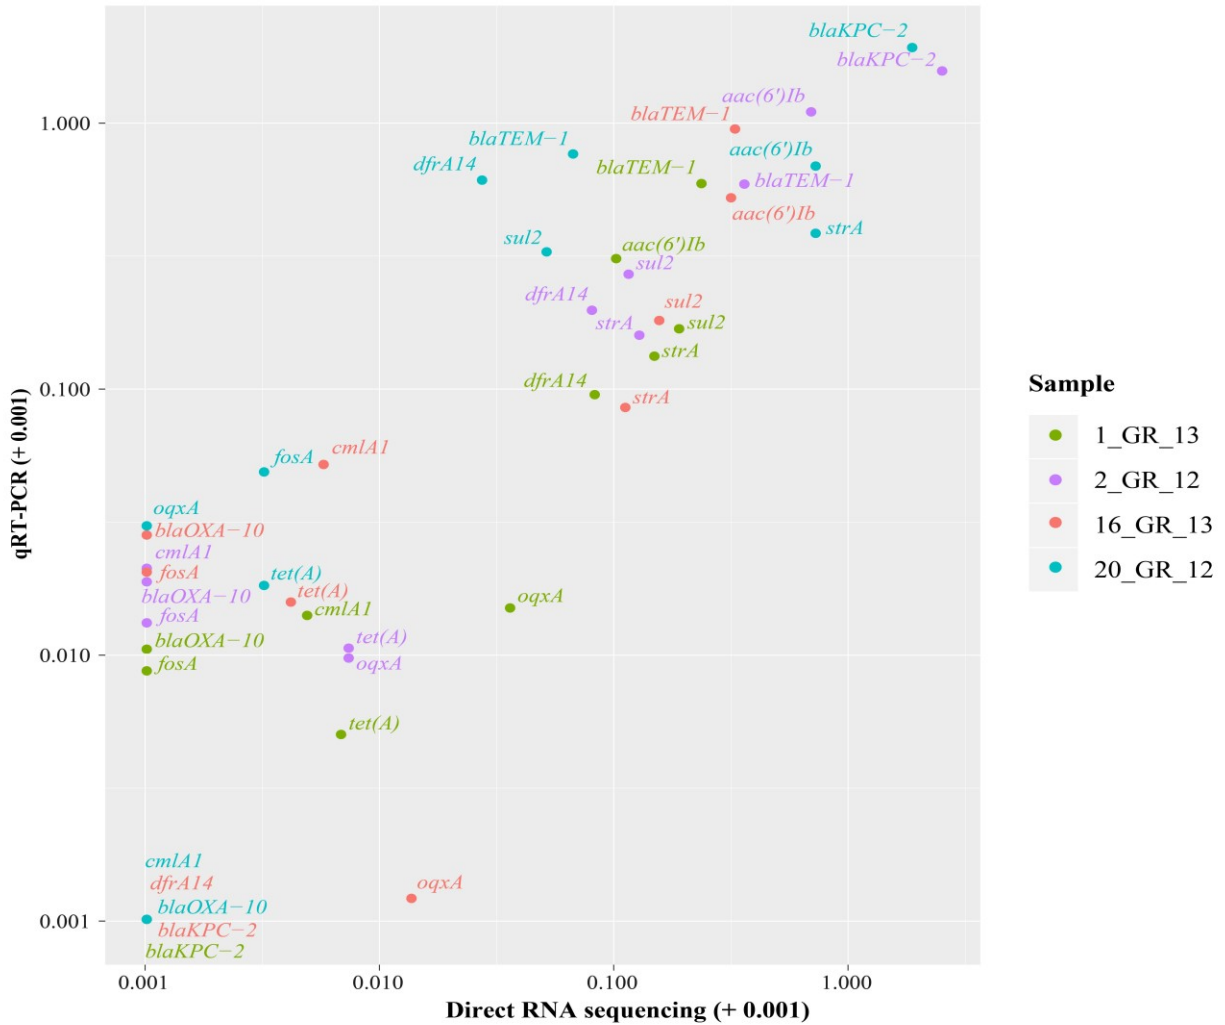

**Figure 3.** Correlation between resistance genes detected via direct RNA sequencing and validated using qRT-PCR. Relative expression was calculated via normalizing to the housekeeping gene, *rpsL* for both direct RNA sequencing ( $\log_2(\text{gene}/rpsL)$ ) and qRT-PCR ( $2^{-\Delta\Delta CT}$ ). Due to high similarity between certain genes, several primers recognise more than one gene. These include *aac(6')Ib*: *aac(6')Ib-cr*, *aadA24*; *strA*: *aph(3'')-Ib* and *blaTEM-1*: *blaTEM-1A*, *blaTEM-1B*.

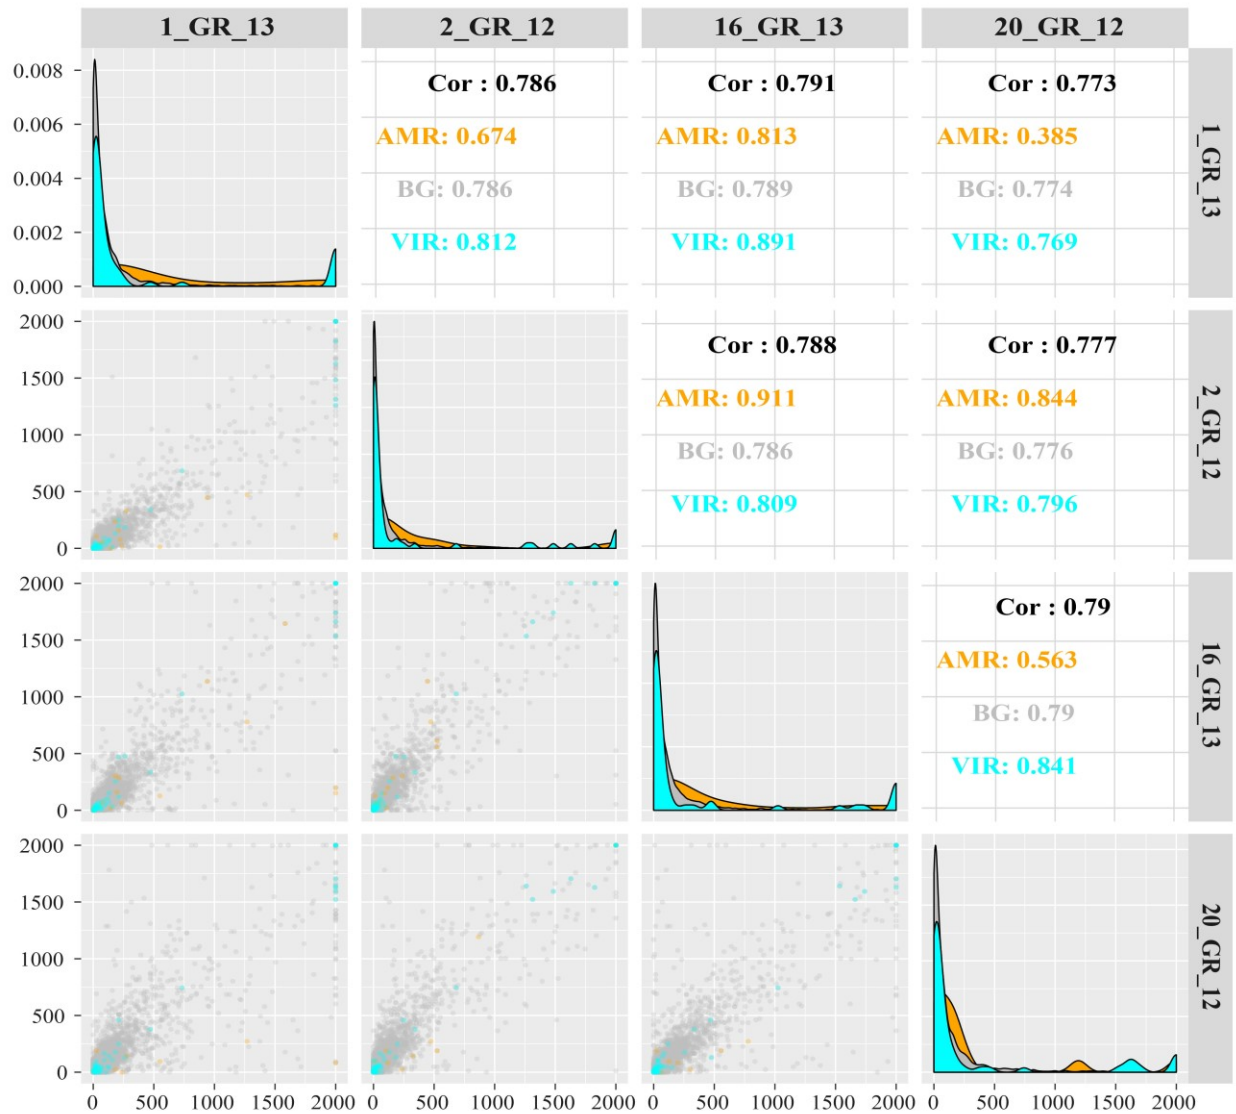

**Figure 4.** Correlation between gene expression in counts per million mapped reads (capped at 2000 cpm) observed in direct RNA sequencing between the four XDR *K. pneumoniae* isolates. Top panels display spearman correlation coefficients. The diagonal panel displays the histogram of gene expression levels (in cpm) for each sample. Colours indicate categorization of gene: antimicrobial resistance genes (AMR) (as per ResFinder 3.0), virulence genes (VIR) (determined via RAST) and all other genes or background genes (BG) are displayed.

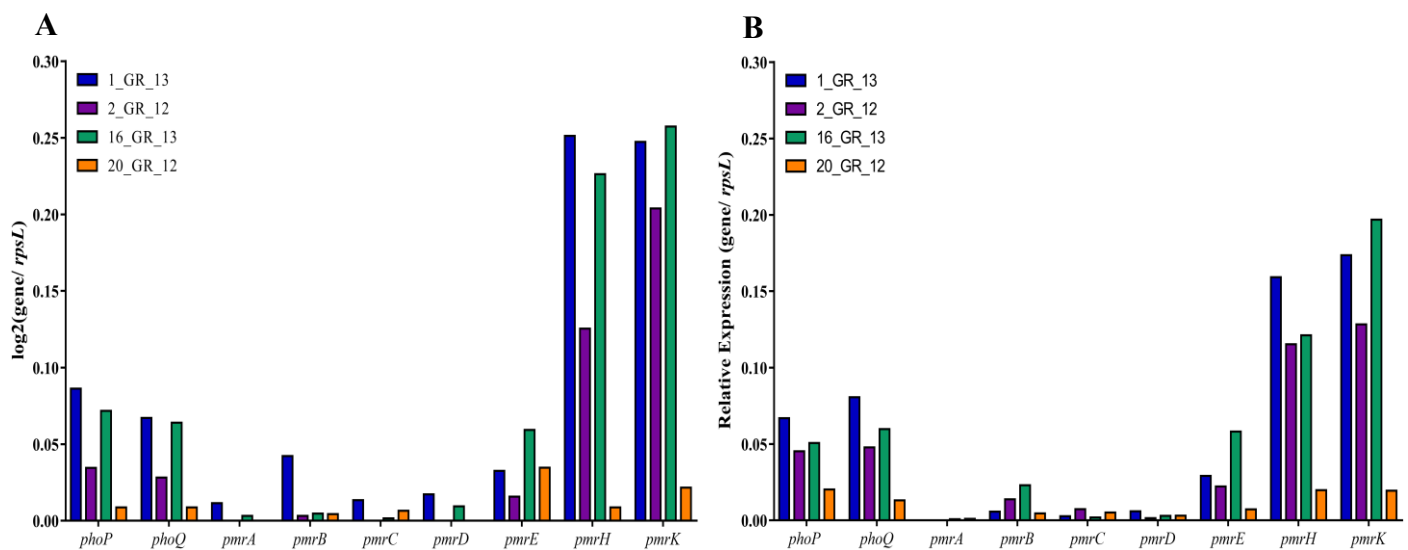

**Figure 5.** Expression of genes associated with the polymyxin resistance pathway. Comparison between (A) direct RNA sequencing and (B) qRT-PCR. Isolates harbouring resistance to polymyxins (MIC: >2 µg/mL) include 1\_GR\_13, 2\_GR\_12 and 16\_GR\_13.
